# Supplementary material for: The Seed Traits Associated with Dormancy and Germination of Herbaceous Peonies, Focusing on Species Native in Serbia and China
Source: MDPI journal article supplement (doi:10.3390/horticulturae8070585), 2022-06-28
Supplement: s1 [file s1]

| <div> <div>PAEONIA L.</div> <div>section <i>Paeoniae</i></div> </div>                                                       |                                                                                                                                 |                                                                                                                                  |                                                                                                                                  |                                                                                                                                    |
|-----------------------------------------------------------------------------------------------------------------------------|---------------------------------------------------------------------------------------------------------------------------------|----------------------------------------------------------------------------------------------------------------------------------|----------------------------------------------------------------------------------------------------------------------------------|------------------------------------------------------------------------------------------------------------------------------------|
| <div> <div>subsect.</div> <div><i>Obovatae</i></div> </div>                                                                 | <div> <div>subsect.</div> <div><i>Onaepiae</i></div> </div>                                                                     | <div> <div>subsect.</div> <div><i>Corallinae</i></div> </div>                                                                    | <div> <div>subsect.</div> <div><i>Albiflorae</i></div> </div>                                                                    | <div> <div>subsect.</div> <div><i>Paeoniae</i></div> </div>                                                                        |
| <div>  <div><i>P. mairei</i></div> </div>  | <div>  <div><i>P. brownii</i></div> </div>     | <div>  <div><i>P. algeriensis</i></div> </div>  | <div>  <div><i>P. anomala</i></div> </div>    | <div>  <div><i>P. arietina</i></div> </div>     |
| <div>  <div><i>P. obovata</i></div> </div> | <div>  <div><i>P. californica</i></div> </div> | <div>  <div><i>P. broteri</i></div> </div>      | <div>  <div><i>P. emodi</i></div> </div>      | <div>  <div><i>P. intermedia</i></div> </div>   |
|                                                                                                                             |                                                                                                                                 | <div>  <div><i>P. cambessedesi</i></div> </div> | <div>  <div><i>P. lactiflora</i></div> </div>  | <div>  <div><i>P. officinalis</i></div> </div>  |
|                                                                                                                             |                                                                                                                                 | <div>  <div><i>P. clusii</i></div> </div>      | <div>  <div><i>P. sterniana</i></div> </div>  | <div>  <div><i>P. parnassica</i></div> </div>  |
|                                                                                                                             |                                                                                                                                 | <div>  <div><i>P. coriacea</i></div> </div>   | <div>  <div><i>P. veitchii</i></div> </div> | <div>  <div><i>P. peregrina</i></div> </div>  |
|                                                                                                                             |                                                                                                                                 | <div>  <div><i>P. corsica</i></div> </div>    |                                                                                                                                  | <div>  <div><i>P. saueri</i></div> </div>     |
|                                                                                                                             |                                                                                                                                 | <div>  <div><i>P. daurica</i></div> </div>    |                                                                                                                                  | <div>  <div><i>P. tenuifolia</i></div> </div> |
|                                                                                                                             |                                                                                                                                 | <div>  <div><i>P. mascula</i></div> </div>    |                                                                                                                                  |                                                                                                                                    |

**Figure S1:** The flowers of the herbaceous peony species of the *Paeonia* L., subsection *Paeoniae* [23,87].
